# Supplementary material
Source: Springer Nature journal article supplement (https://www.springermedizin.de/resource/supplementary/13063_2013_1560_MOESM4_ESM.pdf/9620300)
Supplement: MOESM4 [file 9620300]

## Sample

## Aim

## Data collection

Purposive sample of intervention group participants

Explore experiences of current care and expectations and perceptions of intervention model

Brief face-to-face interview guided by open-ended questions within first 3 months, and at 12 months

Site-specific groups of multidisciplinary health professionals

Explore implementation of model of care and contextual factors impacting delivery and sustainability

Focus groups guided by open-ended questions within first 3 months, and at 12 months

Site-specific key stakeholders at organisational and strategic levels

Explore implementation of model of care and contextual factors impacting delivery and sustainability

Interview guided by open-ended questions within first 3 months, and at 12 months
